# Supplementary material for: Complete Genome Sequence of Industrial Biocontrol Strain Paenibacillus polymyxa HY96-2 and Further Analysis of Its Biocontrol Mechanism
Source: PubMed Central journal article supplement (PMC6052121; doi:10.3389/fmicb.2018.01520), 2018-07-12
Supplement: Data_Sheet_1.pdf [file Data_Sheet_1.pdf]

# **Complete Genome Sequence of Industrial Biocontrol Strain *Paenibacillus polymyxa* HY96-2 and Further Analysis of Its Biocontrol Mechanism**

Yuanchan Luo, Yuejuan Cheng, Jincui Yi, Zhijun Zhang, Qian Luo, Daojing Zhang\*, and Yuanguang Li\*

\* Co-corresponding authors: Yuanguang Li, ygli@ecust.edu.cn; Daojing Zhang, djz@ecust.edu.cn.

## **Supplementary Materials**

Content

Supplementary Figure S1: Distribution diagram of GO functional annotation in the *P. polymyxa* strain HY96-2 genome.

Supplementary Figure S2: The results of animal toxicology test of product of *P. polymyxa* strain HY96-2.

Supplementary Figure S3: The results of environmental toxicology and safety evaluation test of product of *P. polymyxa* strain HY96-2.

Supplementary Table S1: Genomic islands in *P. polymyxa* strain HY96-2

Supplementary Table S2: CRISPR results for the genome of *P. polymyxa* strain HY96-2

Supplementary Table S3: Number of genes in each of the COG functional categories for *P. polymyxa* strain HY96-2

Supplementary Table S4: Homology of 16s rRNA between HY96-2 and other strains of *P. polymyxa*

Supplementary Table S5: Number of specific gene families and genes in each of the *P. polymyxa* strains

Supplementary Table S6: Biocontrol efficacies of *P. polymyxa* wettable powder against bacterial plant diseases in field tests

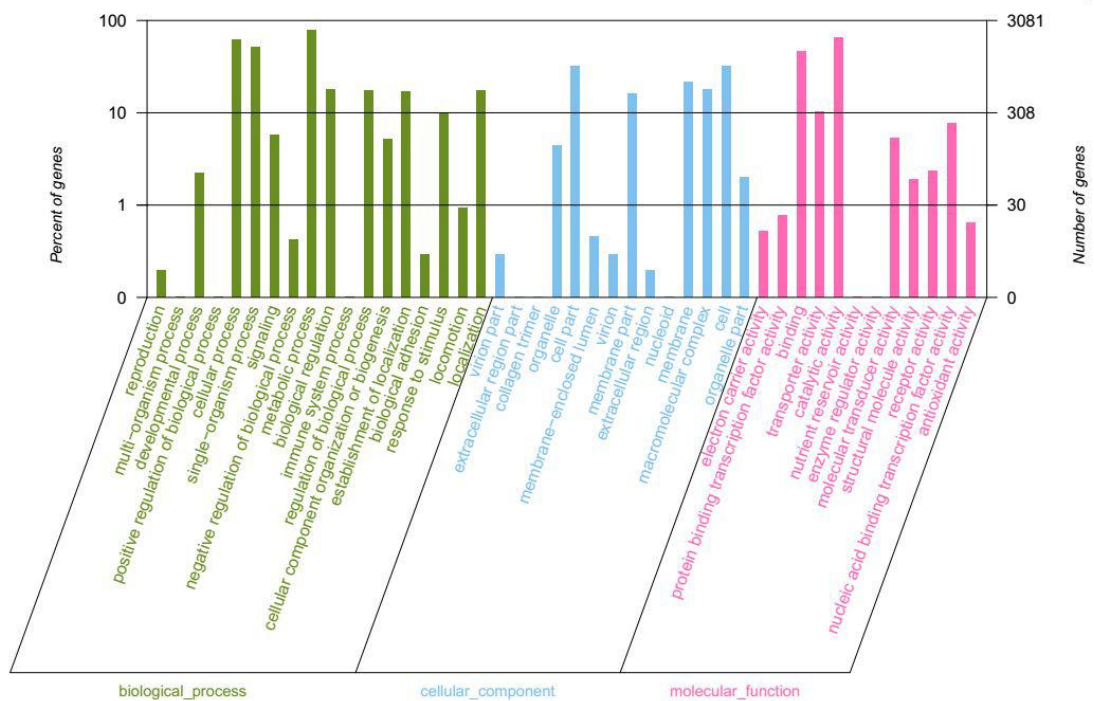

Supplementary Figure S1: Distribution diagram of GO functional annotation in the *P. polymyxa* strain HY96-2 genome.

Supplementary Figure S2: The results of animal toxicology test of product of *P. polymyxa* strain HY96-2.

Summary of the results of animal toxicology test of 5 billion cfu/g technical material of *P. polymyxa* HY96-2

The tests were conducted by School of Public Health, Fudan University, China.

- ① Acute skin toxicity test in rats: LD<sub>50</sub>>5000mg/kg, slight toxicity;
- ② Acute oral toxicity test in rats: LD<sub>50</sub>>5000mg/kg, slight toxicity;
- ③ Acute inhalation toxicity test in rats: LD<sub>50</sub>>5000mg/m<sup>3</sup>, slight toxicity;
- ④ Eye irritation test in rabbits: no irritation;
- ⑤ Guinea-pig skin sensitization test: weak sensitizer
- ⑥ Pathogenicity test in mice: no pathogenicity

**Conclusion:** 5 billion cfu/g technical materia of *P. polymyxa* HY96-2 was a slightly toxic pesticide (slight toxicity is at the lowest level of toxicity in the test.).

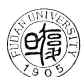

复旦大学公共卫生学院毒理学教研室毒性测试报告

### “50 亿 CFU/g 多粘类芽孢杆菌原药” 毒理学试验报告

备案号: DL0903310210438

实验项目: 大鼠急性经口毒性试验  
大鼠急性经皮毒性试验  
大鼠急性吸入试验  
家兔眼刺激试验  
豚鼠皮肤致敏试验

测试样品: 50 亿 CFU/g 多粘类芽孢杆菌原药

送检单位: 浙江省桐庐汇丰生物化工有限公司

样品接受日期: 2009 年 3 月 27 日

复旦大学公共卫生学院毒理学教研室

2009 年 5 月 27 日

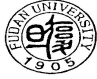

“50 亿 CFU/g 多粘类芽孢杆菌原药”  
大鼠急性经口毒性试验报告

测试物 “50 亿 CFU/g 多粘类芽孢杆菌原药”  
 送检单位 浙江省桐庐汇丰生物化工有限公司  
 封样单位 浙-2009-052  
 送检日期 2009 年 3 月 27 日  
 测试日期 2009 年 3 月 31 日~2009 年 4 月 14 日  
 样品性状 浅棕色粉末  
 测试方法 按 GB 15670-1995 中华人民共和国国家标准“农药登记毒理学试验方法”进行  
 样品处理 样品用蒸馏水配制成试验用液  
 实验动物 健康 SD 成年大鼠，20 只，雌雄各半，体重在 180~200g 范围内，由复旦大学实验动物部提供  
 动物分组 实验设 1 个剂量组，每组动物 10 只，雌雄各半，剂量为 5000mg/kg  
 操作步骤 动物给药前隔夜禁食（15 小时），称重后，按 100g 体重给 1ml 灌胃量给药一次，然后观察并记录动物的急性中毒症状和死亡情况，连续观察二周  
 试验结果：染毒后动物出现体重下降中毒症状、未出现死亡  
 结果评价 按农药的急性经口毒性分级标准进行判定  
 结论 “50 亿 CFU/g 多粘类芽孢杆菌原药”的急性经口毒性试验，雄性、雌性 LD<sub>50</sub> 均大于 5000mg/kg，属微毒类农药。

报告单位：复旦大学公共卫生学院毒理学教研室

测试者：顾锡安、周袁芬

审核者：周志俊

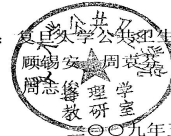

二〇〇九年五月二十七日

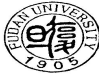

“50 亿 CFU/g 多粘类芽孢杆菌原药”  
大鼠急性经皮毒性试验报告

测试物 “50 亿 CFU/g 多粘类芽孢杆菌原药”  
 送检单位 浙江省桐庐汇丰生物化工有限公司  
 封样单位 浙-2009-052  
 送检日期 2009 年 3 月 27 日  
 测试日期 2009 年 4 月 7 日~2009 年 4 月 21 日  
 样品性状 浅棕色粉末  
 测试方法 按 GB 15670-1995 中华人民共和国国家标准“农药登记毒理学试验方法”进行  
 样品处理 样品用蒸馏水配制成试验用液  
 实验动物 健康 SD 成年大鼠，20 只，雌雄各半，体重在 200~300g 范围内，由复旦大学实验动物部提供  
 动物分组 动物设 1 个剂量组，每组动物 10 只，雌雄各半。剂量为 5000mg/kg  
 操作步骤 动物给药前 24 小时背部去毛，面积为 4cm×5cm。称重后，进行定量敷药，每 100g 体重 0.5ml，然后覆盖盒式罩，以胶布固定。涂药持续时间为 4 小时，随后用水洗去皮肤上残留的农药，观察记录动物皮肤的局部反应和急性中毒反应，观察时间为 2 周  
 试验结果：染毒后动物未出现明显中毒症状、体征和死亡  
 结果评价 按农药的急性经皮毒性分级标准进行判定  
 结论 “50 亿 CFU/g 多粘类芽孢杆菌原药”的大鼠急性经皮毒性试验，雄性、雌性 LD<sub>50</sub> 均大于 5000mg/kg，属微毒类农药。

报告单位：复旦大学公共卫生学院毒理学教研室

测试者：顾锡安、周袁芬

审核者：周志俊

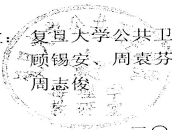

二〇〇九年五月二十七日

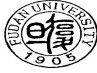

### “50 亿 CFU/g 多粘类芽孢杆菌原药” 大鼠急性吸入毒性试验报告

测试物 “50 亿 CFU/g 多粘类芽孢杆菌原药”  
送检单位 浙江省桐庐汇丰生物化工有限公司  
封样单位 浙-2009-052  
送检日期 2009 年 3 月 27 日  
测试日期 2009 年 4 月 8 日~2009 年 4 月 22 日  
样品性状 浅棕色粉末  
测试方法 按 GB 15670-1995 中华人民共和国国家标准“农药登记毒理学试验方法”进行  
样品处理 样品直接称量用于试验  
实验动物 健康 SD 成年大鼠, 20 只, 雌雄各半, 体重在 180~200g 范围内, 由复旦大学实验动物部提供  
动物分组 动物设一个剂量组, 共 20 只, 雌雄各半, 剂量为 5000mg/m<sup>3</sup>  
操作步骤 静式染毒, 50 升的染毒柜 4 只, 每只染毒柜中放大鼠 5 只。将试验用液, 称 250mg 放入染毒柜中, 样品直接放入底部。将上下放入小型电风扇。再将动物放入染毒柜, 密闭。染毒 2 小时, 取出动物。观察其反应, 连续观察 2 周  
试验结果 染毒大鼠没有出现异常  
结果评价 按农药的急性毒性分级标准进行判定  
结论 “50 亿 CFU/g 多粘类芽孢杆菌原药”的大鼠吸入毒性试验, 雄性、雌性的 LC<sub>50</sub> 均大于 5000mg/m<sup>3</sup>, 属微毒类农药。

报告单位: 复旦大学公共卫生学院毒理学教研室  
测试者: 周锡葵 周袁志  
审核者: 周志俊 周志俊  
二〇〇九年五月二十七日

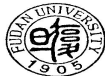

### “50 亿 CFU/g 多粘类芽孢杆菌原药” 家兔眼刺激试验测试报告

测试物 “50 亿 CFU/g 多粘类芽孢杆菌原药”  
送检单位 浙江省桐庐汇丰生物化工有限公司  
封样单位 浙-2009-052  
送检日期 2009 年 3 月 27 日  
测试日期 2009 年 3 月 31 日~2009 年 4 月 7 日  
样品性状 浅棕色粉末  
测试方法 按 GB 15670-1995 中华人民共和国国家标准“农药登记毒理学试验方法”进行  
样品处理 样品直接用于试验  
试验动物 健康新西兰白兔, 4 只, 双眼正常, 体重在 2~3kg 范围内, 由复旦大学实验动物部提供  
操作步骤 将左侧下眼睑轻轻下拉, 将试验用液 100mg 直接滴入动物眼结膜囊内, 闭合眼睑约 1 分钟。然后分别在 1 小时、24 小时、72 小时、4 天和 7 天观察动物结膜、角膜、虹膜等眼睛其它部位受损情况  
试验结果 见附表 1 (另页)  
结果评价 每只动物试验结果按眼损伤程度评分表评分, 最后按眼睛刺激性分级标准进行判定  
结论 “50 亿 CFU/g 多粘类芽孢杆菌原药”在对家兔眼刺激试验中, 表现为无刺激性。

报告单位: 复旦大学公共卫生学院毒理学教研室  
测试者: 周锡葵 周袁志  
审核者: 周志俊 周志俊  
二〇〇九年五月二十七日

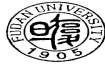

### “50 亿 CFU/g 多粘类芽孢杆菌原药”

#### 豚鼠致敏试验报告

**测试物** “50 亿 CFU/g 多粘类芽孢杆菌原药”  
**送检单位** 浙江省桐庐汇丰生物化工有限公司  
**封样单位** 浙-2009-052  
**送检日期** 2009 年 3 月 27 日  
**测试日期** 2009 年 3 月 31 日~2009 年 5 月 26 日  
**样品性状** 浅棕色粉末  
**测试方法** 按 GB 15670-1995 中华人民共和国国家标准“农药登记毒理学实验方法”进行  
**样品处理** 样品用蒸馏水配制成试验用液  
**实验动物** 健康成年豚鼠, 42 只, 由复旦大学实验动物部提供  
**动物分组** 动物分为 3 组, 每组 14 只(雌 7, 雄 7)。分别为阴性对照(蒸馏水)组、实验组、阳性对照(二硝基氯苯)组  
**操作步骤** 实验前 24 小时动物背部左侧剃毛(3cm × 3cm)。将“50 亿 CFU/g 多粘类芽孢杆菌原药”(称 2g 加 2ml 蒸馏水)、阳性对照(0.5%)和蒸馏水分 14 份涂在 2cm × 2cm 的滤纸上, 敷贴在剃毛区, 固定, 6 小时后冲洗。在第 7 天和第 14 天分别重复一次  
在开始实验(首次涂药)后第 27 天将实验组和阳性对照组动物背部右侧剃毛(2cm × 2cm), 次日(第 28 天)涂敷“50 亿 CFU/g 多粘类芽孢杆菌原药”(称 1.5g 加 2ml 蒸馏水)和阳性对照(0.2%)各 0.1ml, 固定, 6 小时后冲洗。观察至第 42 天。第 43 天实验组动物再涂“50 亿 CFU/g 多粘类芽孢杆菌原药”一次, 观察至第 56 天  
**试验结果** 阴性对照组和实验组在实验过程中, 未发现任何皮肤异常, 阳性对照组动物皮肤均有改变  
**结果评价** 按农药的皮肤变态(致敏)反应分级标准进行判定  
**结论** “50 亿 CFU/g 多粘类芽孢杆菌原药”的豚鼠致敏试验, 不引起豚鼠皮肤的改变, 属弱致敏物。

报告单位: 复旦大学公共卫生学院毒理学教研室

测试者: 顾德安 周志敏

审核者: 周志敏 顾德安

二〇〇九年五月二十七日

Supplementary Figure S3: The results of environmental toxicology and safety evaluation test of product of *P. polymyxa* strain HY96-2.

Summary of the results of environmental toxicology and safety evaluation test of 5 billion cfu/g technical material of *P. polymyxa* HY96-2

The tests were conducted by Institute of Pesticide and Environmental Toxicology, Zhejiang University, China.

- ① Quail: LD<sub>50</sub> (7d) > 1000 mg/kg avoirdupois;
- ② Bee: LC<sub>50</sub> (48h) > 2000 mg/L, LD<sub>50</sub> (48h) > 100 µg/bee, low toxicity;
- ③ Silkworm: LC<sub>50</sub> (96h) > 2000 mg/L, low toxicity;
- ④ Zebrafish: LC<sub>50</sub> (96h) > 100 mg/L, low toxicity;
- ⑤ Green algae: EC<sub>50</sub> (72h) = 14.5 mg/L, low toxicity;
- ⑥ Daphnia magna: LC<sub>50</sub> (48h) > 200 mg/L, low toxicity.

**Conclusion:** 5 billion cfu/g technical materiaof *P. polymyxa* HY96-2 was a low toxic pesticide, and safe to environment (low toxicity is at the lowest level of toxicity in the test.).

试验委托单位

浙江省桐庐汇丰生物化工有限公司

试验项目

## 50 亿 CFU/g 多粘类芽孢杆菌原药 对环境生物毒性试验

备案号：HD0903270070189

试验研究号：2009-T-137

项目负责人：李少南

报告编写人：魏方林

报告完成日期

2009 年 8 月 14 日

浙江大学农药与环境毒理研究所

地址：浙江省杭州市凯旋路 268 号

邮编：310029 电话：(0571) 86430193 传真：(0571) 86971220

### 试验责任者声明

试验项目: 50 亿 CFU/g 多粘类芽孢杆菌原药对环境生物毒性试验  
试验研究号: 2009-T-137

本试验按照中华人民共和国国家环保局《化学农药环境安全评价试验准则》的规定在本研究所计量论证实验条件下进行。试验过程严格按照试验计划书进行, 本报告真实而正确反映了试验结果。

试验结果仅对来样负责。

项目负责人(签名)  09年8月14日

报告编写人(签名)  09年8月14日

实验室负责人(签名)  09年8月14日

### 试验质量保证书

试验项目: 50 亿 CFU/g 多粘类芽孢杆菌原药对环境生物毒性试验

试验研究号: 2009-T-137

本试验严格按照试验计划书及有关试验方法进行, 本报告内容准确地反映了该试验的原始数据, 特此证明。

QUA 负责人(签名) 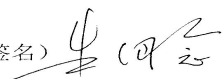 2009年8月24日



## 5 结论

表 15 50 亿 CFU/g 多粘类芽孢杆菌原药对非靶生物毒性结果汇总

| 供试生物 | 考察指标                   | 测定结果             | 毒性等级 <sup>a</sup> |
|------|------------------------|------------------|-------------------|
| 鹌鹑   | LD <sub>50</sub> (7d)  | >1000mg/(kg av.) | 低毒                |
| 蜜蜂   | LC <sub>50</sub> (48h) | >2000mg/L        | 低毒                |
| 蜜蜂   | LD <sub>50</sub> (48h) | >100μg/bee       | 低毒                |
| 家蚕   | LC <sub>50</sub> (96h) | >2000mg/L        | 低毒                |
| 斑马鱼  | LC <sub>50</sub> (96h) | >100mg/L         | 低毒                |
| 绿藻   | EC <sub>50</sub> (72h) | 14.5mg/L         | 低毒                |
| 大型溞  | LC <sub>50</sub> (48h) | >200mg/L         | 低毒                |

注: 1 “av.”为“avoirdupois”缩写, 表示“体重”。

2<sup>a</sup> 依据我国目前采用的农药对环境生物毒性分级标准。

签发人(签名):

浙江大学农药与环境毒理研究所

2009年8月14日

农药与环境毒理  
研究所

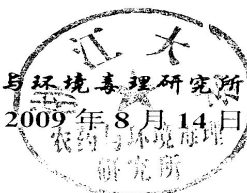

Supplementary Table S1: Genomic islands in *P. polymyxa* strain HY96-2

| No. | Start   | End     | Length |
|-----|---------|---------|--------|
| 1   | 556582  | 562227  | 5645   |
| 2   | 1277208 | 1291135 | 13927  |
| 3   | 2377804 | 2384236 | 6432   |
| 4   | 2469151 | 2507664 | 38513  |
| 5   | 2592825 | 2598206 | 5381   |
| 6   | 2783512 | 2885231 | 101719 |
| 7   | 2859583 | 2863998 | 4415   |
| 8   | 2875334 | 2883966 | 8632   |
| 9   | 3069005 | 3073460 | 4455   |
| 10  | 3940617 | 3949287 | 8670   |
| 11  | 3955813 | 3967619 | 11806  |
| 12  | 3968586 | 3975853 | 7267   |
| 13  | 3988233 | 3994070 | 5837   |
| 14  | 4929857 | 4971440 | 41583  |
| 15  | 5671663 | 5699257 | 27594  |
| 16  | 5686148 | 5693277 | 7129   |

Supplementary Table S2: CRISPR results for the genome of *P. polymyxa* strain HY96-2

| Method       | Start   | End     | Description |
|--------------|---------|---------|-------------|
| CRISPRFinder | 4753030 | 4753122 | Putative    |

Supplementary Table S3: Number of genes in each of the COG functional categories for *P. polymyxa* strain HY96-2

| Functional_categories                                         | Number of genes | Percentage (%) |
|---------------------------------------------------------------|-----------------|----------------|
| Translation, ribosomal structure and biogenesis               | 161             | 3.09           |
| Transcription                                                 | 228             | 4.38           |
| Replication, recombination and repair                         | 111             | 2.13           |
| Cell cycle control, cell division, chromosome partitioning    | 23              | 0.44           |
| Cell wall/membrane/envelope biogenesis                        | 113             | 2.17           |
| Cell motility                                                 | 36              | 0.69           |
| Posttranslational modification, protein turnover, chaperones  | 85              | 1.63           |
| Signal transduction mechanisms                                | 135             | 2.59           |
| Intracellular trafficking, secretion, and vesicular transport | 19              | 0.36           |
| Defense mechanisms                                            | 51              | 0.98           |
| Energy production and conversion                              | 145             | 2.78           |
| Amino acid transport and metabolism                           | 245             | 4.71           |
| Nucleotide transport and metabolism                           | 80              | 1.54           |
| Carbohydrate transport and metabolism                         | 328             | 6.30           |
| Coenzyme transport and metabolism                             | 96              | 1.84           |
| Lipid transport and metabolism                                | 80              | 1.54           |
| Inorganic ion transport and metabolism                        | 208             | 3.99           |
| Secondary metabolite biosynthesis, transport and catabolism   | 40              | 0.77           |
| General function prediction only                              | 202             | 3.88           |
| Function unknown                                              | 219             | 4.21           |

Supplementary Table S4: Homology of 16s rRNA between HY96-2 and other strains of *P. polymyxa*

| Strain | Resource                  | Percentage of homology of 16s rRNA with HY96-2 (%) |
|--------|---------------------------|----------------------------------------------------|
| SC2    | Pepper rhizosphere        | 97.82                                              |
| E681   | Winter barley rhizosphere | 97.38                                              |
| M-1    | Wheat rhizosphere         | 97.87                                              |
| SQR-21 | Melon rhizosphere         | 98.84                                              |
| CR1    | Degraded corn straw       | 96.83                                              |
| YC0136 | Tobacco rhizosphere       | 97.44                                              |
| YC0573 | Tobacco rhizosphere       | 97.51                                              |

Supplementary Table S5: Number of specific gene families and genes in each of the *P. polymyxa* strains

| Strain | Number of families | Number of genes |
|--------|--------------------|-----------------|
| HY96-2 | 448                | 468             |
| SC2    | 58                 | 58              |
| E681   | 383                | 395             |
| SQR-21 | 279                | 285             |
| M-1    | 186                | 196             |
| CR1    | 216                | 224             |
| YC0573 | 174                | 176             |
| YC0136 | 213                | 216             |

Supplementary Table S6: Biocontrol efficacies of *P. polymyxa* wettable powder against bacterial plant diseases in field tests

| Treatment                     | Biocontrol efficacy <sup>a</sup> |                            |
|-------------------------------|----------------------------------|----------------------------|
|                               | Against <i>R. solanacearum</i>   | Against <i>P. syringae</i> |
| Agent I <sup>b</sup>          | 91.03±0.71 aA                    | 81.08±3.32 aA              |
| Agent II <sup>b</sup>         | 83.48±3.22 bB                    | 74.90±2.42 bB              |
| Agent III <sup>b</sup>        | 73.13±4.54 cC                    | 68.20±1.76 cC              |
| Positive control <sup>c</sup> | 66.13±3.59 dC                    | 76.25±1.63 bAB             |

<sup>a</sup>The two field tests were carried out in Hainan Province, China. The data for the biocontrol efficacies are expressed as the mean ± standard deviation. The SPSS software (version 17.0) was used for the statistical analysis, and the results of Duncan's multiple range test at  $p=0.05$  and  $p=0.01$  are expressed by the lowercase and capital letters, respectively, following each entry. Different lowercase or capital letters following each entry indicate a statistically significant difference between the data in the corresponding confidence level.

<sup>b</sup>The dosages of *P. polymyxa* strain HY96-2 agents I, II, and III used against *R. solanacearum* on tomato were  $10^9$  CFU/g *P. polymyxa* wettable powder (PPWP) at 10.2, 8.4, and 6.6 kg/hectare, respectively. The dilutions of *P. polymyxa* strain HY96-2 agents I, II, and III used against *P. syringae* on cucumber were  $10^9$  billion CFU/g PPWP diluted by 300, 600, and 900 times, respectively.

<sup>c</sup>Positive controls against *R. solanacearum* and *P. syringae* were  $10^7$  CFU/g *P. Polymyxa granulae subtilae* at dosages of 37.5 kg/hectare and 77% Kocide wettable powder at 500 times dilution, respectively.
